# Supplementary material for: Insight into the adsorption properties of a β-cyclodextrin/phillipsite organophilic composite for effective removal of toxic organophosphorus pesticides: kinetic and advanced equilibrium studies
Source: Royal Society of Chemistry journal article supplement (doi:10.1039/d2nj03555c), 2022-01-01
Supplement: d2nj03555c1.pdf [file d2nj03555c1.pdf]

## Insight into the adsorption properties of $\beta$ -cyclodextrin/phillipsite organophilic composite for effective removal of toxic organophosphorous pesticides: kinetic and advanced equilibrium studies

Sarah I. Othman<sup>1</sup>, Haifa A. Alqhtani<sup>1</sup>, Ahmed A. Allam<sup>2</sup>, Abdelrahman M. Rabie<sup>3</sup>, Asmaa A. Abdelrahman<sup>4</sup>, Heba M. Salem<sup>4</sup>, Mostafa R. Abukhadra<sup>5,6</sup>\*

<sup>1</sup>Biology Department, Faculty of Science, Princess Nourah bint Abdulrahman University, Riyadh, Saudi Arabia

<sup>2</sup>Zoology Department, Faculty of Science, Beni-Suef University, Beni-Suef, Egypt

<sup>3</sup>Petrochemical Department, Egypt Petroleum Research Institute, Nasr city, 112672, Egypt

<sup>4</sup>Refining Department, Egypt Petroleum Research Institute, Nasr city, 112672, Egypt

<sup>5</sup>Geology Department, Faculty of Science, Beni-Suef University, Beni-Suef, 65211, Egypt

<sup>6</sup>Materials Technologies and their Applications Lab, Geology Department, Faculty of Science, Beni-Suef University, Beni-Suef City, Egypt.

Corresponding author\*. Tel: +2001288447189. E-mail: [Abukhadra89@Science.bsu.edu.eg](mailto:Abukhadra89@Science.bsu.edu.eg)

**Table.S1.** Nonlinear equations of kinetic, classic isotherm, and advanced isotherm models

| <b>Kinetic models</b>                                     |                                                                                                              |                                                                                                                                                                                             |
|-----------------------------------------------------------|--------------------------------------------------------------------------------------------------------------|---------------------------------------------------------------------------------------------------------------------------------------------------------------------------------------------|
| <b>Model</b>                                              | <b>Equation</b>                                                                                              | <b>Parameters</b>                                                                                                                                                                           |
| <b>Pseudo-first-order</b>                                 | $Q_t = Q_e (1 - e^{-k_1 t})$                                                                                 | $Q_t$ (mg/g) is the adsorbed ions at time (t), and $K_1$ is the rate constant of the first-order adsorption (1/min)                                                                         |
| <b>Pseudo-second-order</b>                                | $Q_t = \frac{Q_e^2 k_2 t}{1 + Q_e k_2 t}$                                                                    | $Q_e$ is the quantity of adsorbed ions after equilibration (mg/g), and $K_2$ is the model rate constant (g/mg min).                                                                         |
| <b>Classic Isotherm models</b>                            |                                                                                                              |                                                                                                                                                                                             |
| <b>Model</b>                                              | <b>Equation</b>                                                                                              | <b>Parameters</b>                                                                                                                                                                           |
| <b>Langmuir</b>                                           | $Q_e = \frac{Q_{max} b C_e}{(1 + b C_e)}$                                                                    | $C_e$ is the rest ions concentrations (mg/L), $Q_{max}$ is the theoretical maximum adsorption capacity (mg/g), and $b$ is the Langmuir constant (L/mg)                                      |
| <b>Freundlich</b>                                         | $Q_e = K_f C_e^{1/n}$                                                                                        | $K_f$ (mg/g) is the constant of Freundlich model related to the adsorption capacity and $n$ is the constant of Freundlich model related to the adsorption intensities                       |
| <b>Dubinin–Radushkevich</b>                               | $Q_e = Q_m e^{-\beta \varepsilon^2}$                                                                         | $\beta$ (mol <sup>2</sup> /KJ <sup>2</sup> ) is the D-R constant, $\varepsilon$ (KJ <sup>2</sup> /mol <sup>2</sup> ) is the polanyil potential, and $Q_m$ is the adsorption capacity (mg/g) |
| <b>Advanced isotherm models</b>                           |                                                                                                              |                                                                                                                                                                                             |
| <b>Model</b>                                              | <b>Equation</b>                                                                                              | <b>Parameters</b>                                                                                                                                                                           |
| <b>Monolayer model with one energy site (Model 1)</b>     | $Q = n N_o = \frac{n N_M}{1 + (\frac{C1/2}{C})^n} = \frac{Q_o}{1 + (\frac{C1/2}{C})^n}$                      | $Q$ is the adsorbed quantities in mg/g<br>$n$ is the number of adsorbed ion per site<br>$N_m$ is the density of the effective receptor sites (mg/g)                                         |
| <b>Monolayer model with two energy sites (Model 2)</b>    | $Q = \frac{n_1 N_{1M}}{1 + (\frac{C_1}{C})^{n_1}} + \frac{n_2 N_{2M}}{1 + (\frac{C_2}{C})^{n_2}}$            | $Q_o$ is the adsorption capacity at the saturation state in mg/g<br>$C1/2$ is the concentration of the ions at half saturation stage in mg/L                                                |
| <b>Double layer model with one energy site (Model 3)</b>  | $Q = Q_o \frac{(\frac{C}{C1/2})^n + 2(\frac{C}{C1/2})^{2n}}{1 + (\frac{C}{C1/2})^n + (\frac{C}{C1/2})^{2n}}$ | $C1$ and $C2$ are the concentrations of the ions at the half saturation stage for the first active sites and the second active sites, respectively                                          |
| <b>Double layer model with two energy sites (Model 3)</b> | $Q = Q_o \frac{(\frac{C}{C1})^n + 2(\frac{C}{C2})^{2n}}{1 + (\frac{C}{C1})^n + (\frac{C}{C2})^{2n}}$         | $n1$ and $n2$ are the adsorbed ions per site for the first active sites and the second active sites, respectively                                                                           |

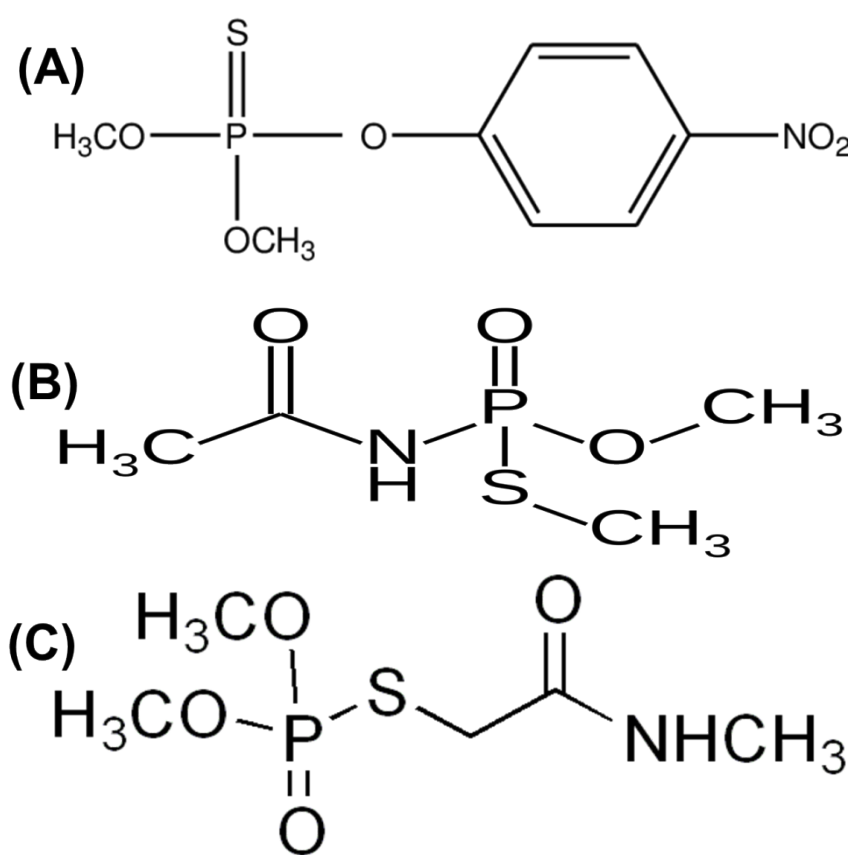

**Fig.S1.** The molecular structures of MPn (A), AC (B), and OM (C) pesticides

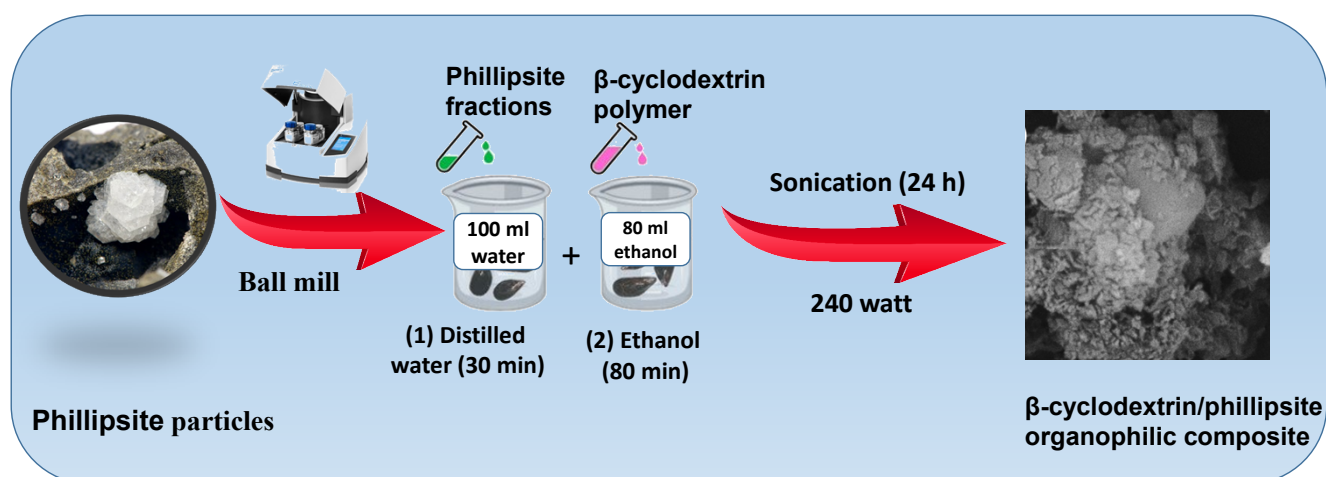

**Fig.S2.** Schematic diagram for the synthesis of CD/Ph composite

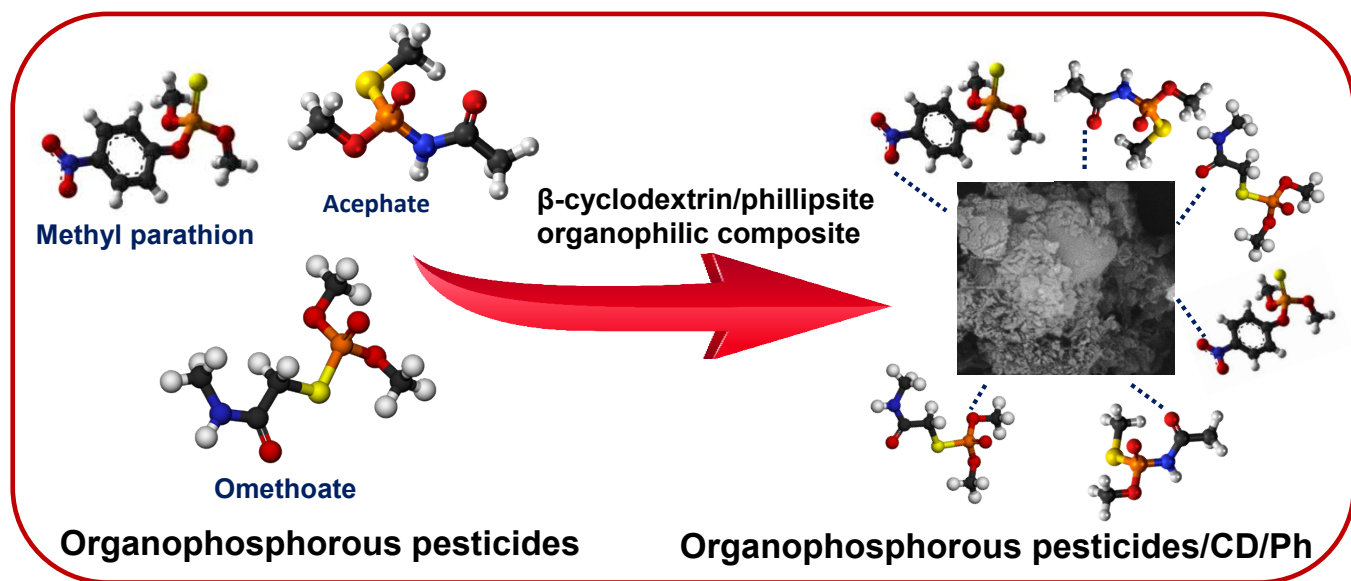

Fig.S3. Schematic diagram for adsorption of the different species of pesticides by CD/Ph composite
